# Supplementary material for: Novel Therapies to Address Unmet Needs in ITP
Source: MDPI journal article supplement (doi:10.3390/ph15070779), 2022-06-23
Supplement: s1 [file s1]

## SUPPLEMENTARY FIGURES AND TABLES

### Supplementary Figure S1. Targets of the first and second-line treatments in ITP.

APC, antigen presenting cell; CTC, corticosteroids; ITP, primary immune thrombocytopenia; KC, Kupffer cell; RTX, rituximab; TPO-RAs, thrombopoietin receptor agonists.

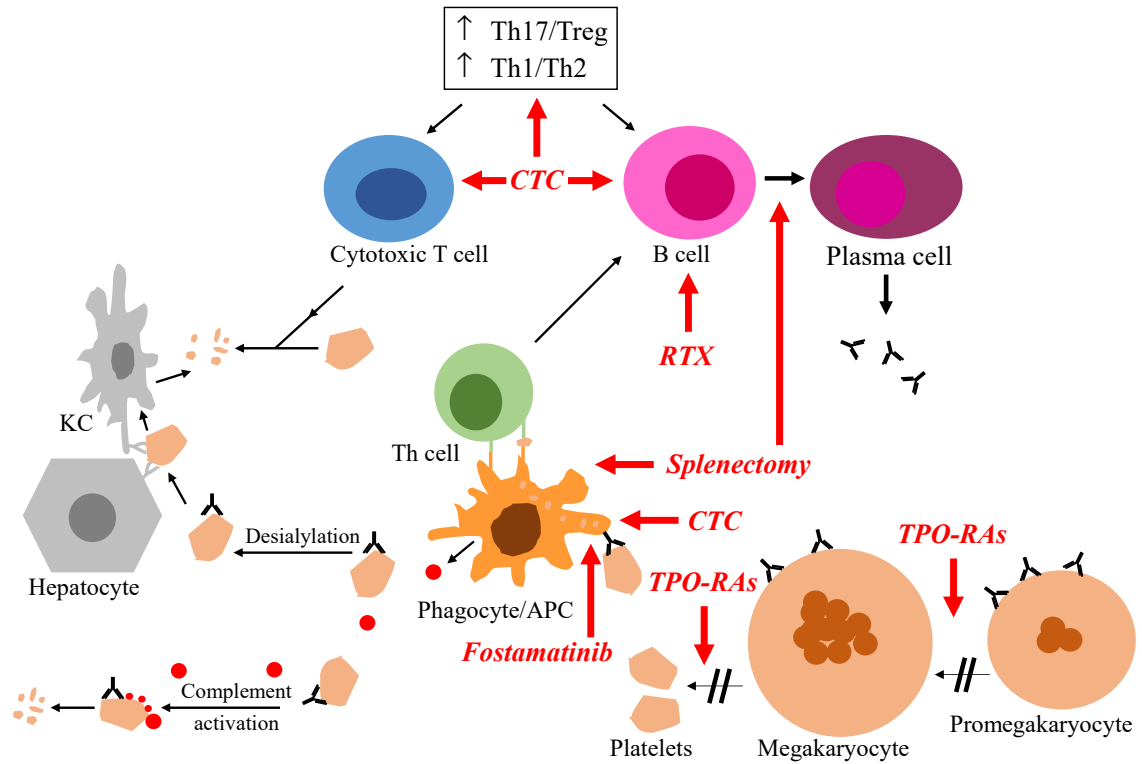

**Supplementary Figure S2. Targets of the newer ITP treatments.**

APC, antigen presenting cell; ITP, primary immune thrombocytopenia; KC, Kupffer cell.

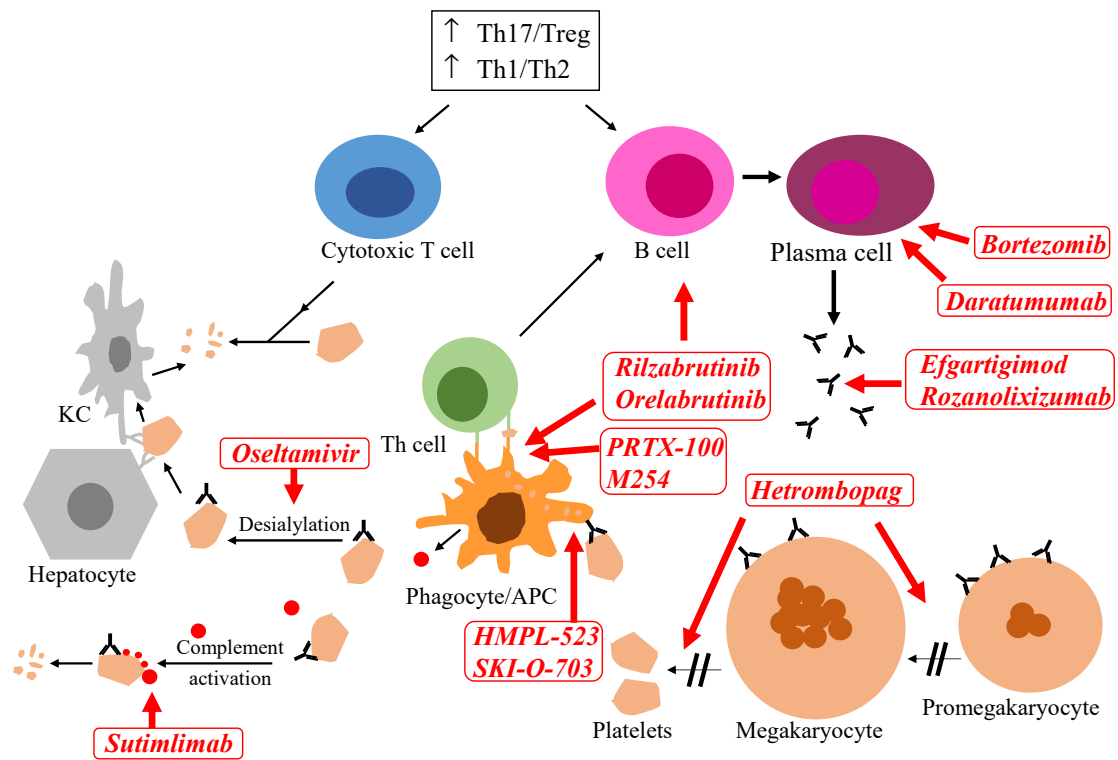

**Supplementary Figure S3. Inhibition of Syk.** HMPL-523 and SKI-O-703 block the kinase activity of Syk, which is engaged soon after interaction between the Fc domain of the platelet-opsonizing autoantibody and the receptor for Fc domain on the immune cell. Blocking of Syk prevents downstream signaling, thus reducing cell phagocytic capacity. Syk, spleen tyrosine kinase.

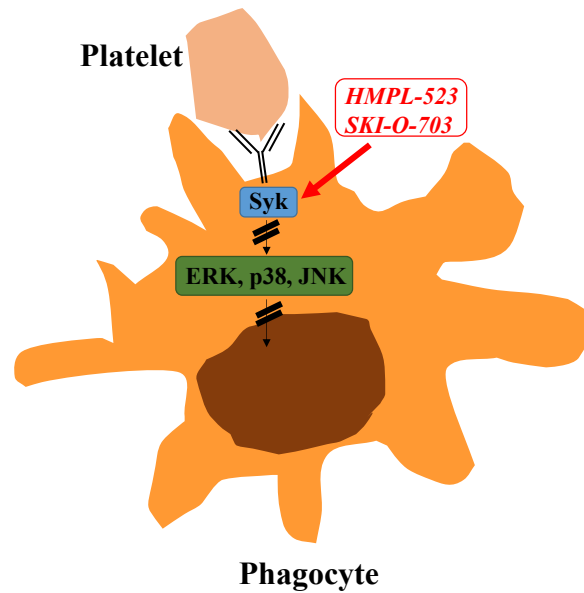

**Supplementary Figure S4. Inhibition of BTK.** Rilizabrutinib and orelabrutinib block the kinase activity of BTK, which plays a central role in the signaling pathways triggered upon interaction between the Fc domain of the platelet-opsonizing autoantibody and the receptor for Fc domain on the immune cell. As a consequence, the activity of various cell actors responsible for the immune disbalance in ITP is reduced. BTK, Bruton's tyrosine kinase; Syk, spleen tyrosine kinase.

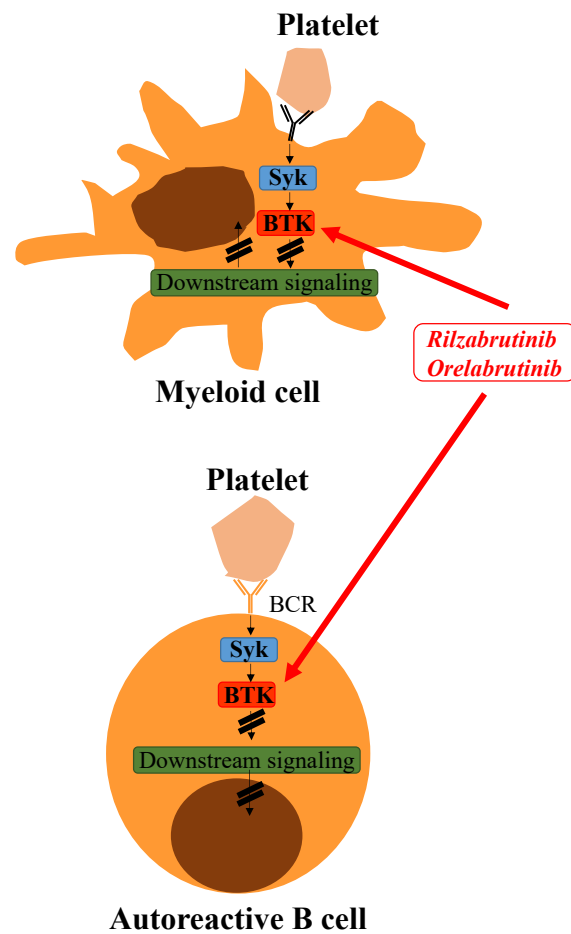

**Supplementary Figure S5. Inhibition of FcRn.** Circulating antibodies experience a process of cell recycling, during which they are embedded in endosomes. Binding to FcRn prevents release of antibodies into the lysosomal compartment, and its subsequent cleavage, allowing the release to the extracellular fluid. Prevention of the interaction between antibodies and FcRn (efgartigimod, rozanolixizumab) facilitates antibody destruction.

FcRn, neonatal Fc receptor.

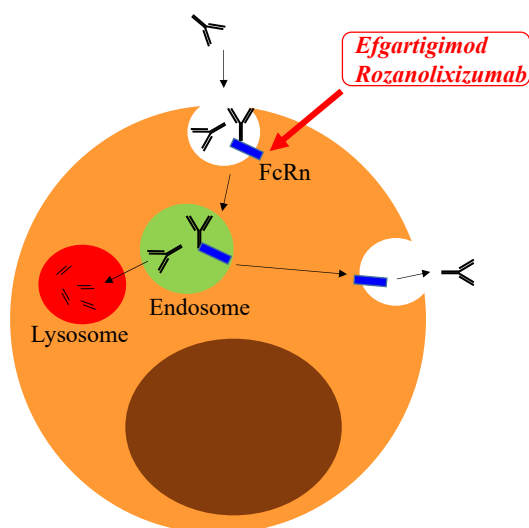

**Circulating and endothelial cells**

**Supplementary Figure S6. Direct inhibition of FcγRIII.** Opsonized platelets are fixed to the phagocyte surface by the Fc domain of the autoantibody, which interacts with membrane glycoprotein FcγRIII (CD16). Staphylococcal protein A (PRTX-100) is able to inhibit FcγRIII (CD16), thus disrupting the process leading to destruction of the opsonized platelet.

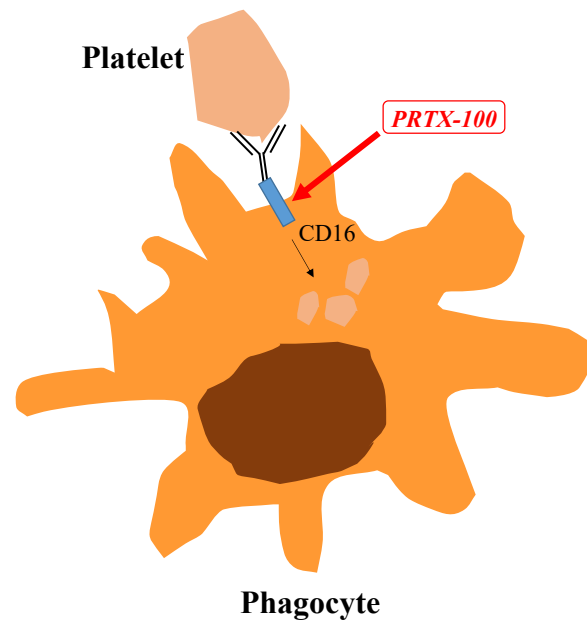

**Supplementary Figure S7. Inhibition of Fc $\gamma$ RIII by promoting Fc $\gamma$ RIIb activity.** Unlike many Fc receptors of the phagocyte, Fc $\gamma$ RIIb exerts antiphagocytic activity by inhibiting Fc $\gamma$ RIII. Hyper-sialylated immunoglobulins (M254) promote efficiently up-regulation of the Fc $\gamma$ RIIb.

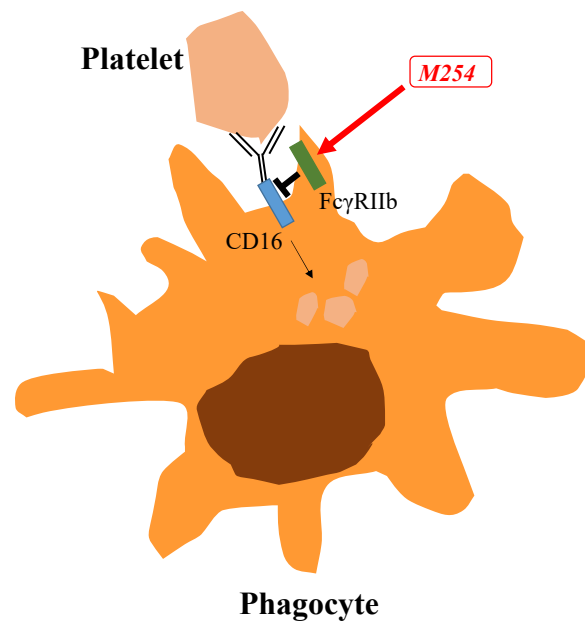

**Supplementary Figure S8. Inhibition of the classical pathway of the complement system.** The Fc domain of opsonizing autoantibodies triggers activation of complement by the classical pathway. By blocking the activity of the C1s component of complement system, sutimlimab induces the disruption of the cascade and the subsequent assembly of the membrane attack complex.

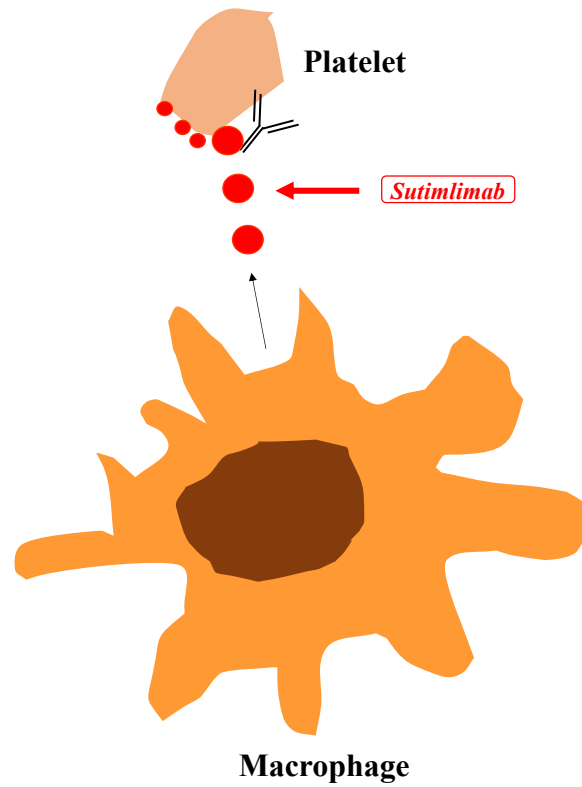



**Supplementary Figure S9. Inhibition of platelet desialylation.** Opsonized platelets are not protected against desialylation of O-glycans of surface glycoproteins by neuraminidases, and desialylated platelets are cleared in the liver through a coordinated action between hepatocytes, which react with desialylated platelets via Ashwell-Morell receptors, and Kupffer cells. By blocking neuraminidase activity, oseltamivir prevents platelet desialylation and the subsequent hepatic clearance.

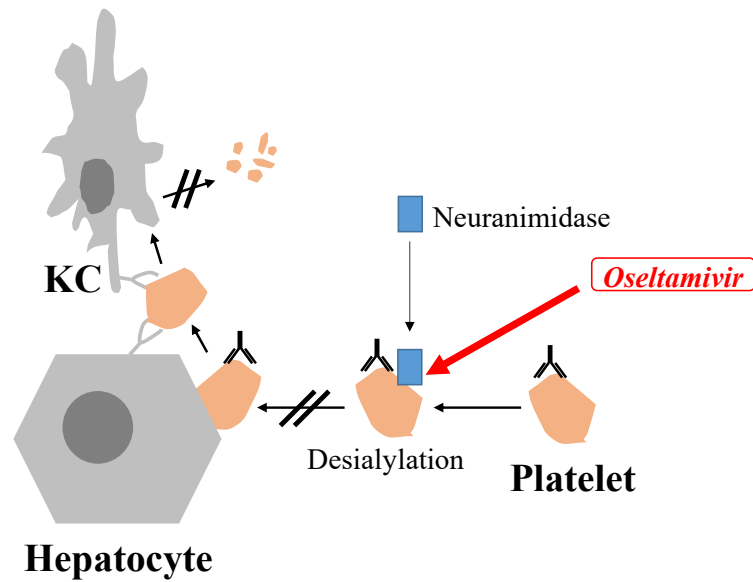

**Supplementary Figure S10. Inhibition of CD38.** CD38 is expressed in a variety of immune cells, and particularly on the surface of antibody-producing plasmablasts, where it exerts prosurvival and other actions. By inhibiting CD38, daratumumab reduces production of autoantibodies and cytokines by plasma cells and NK respectively, and promotes apoptosis.

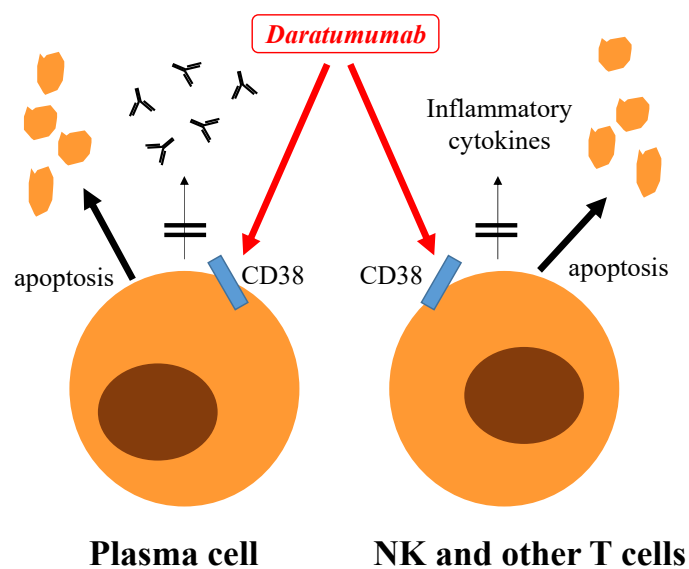

**Supplementary Figure S11. Inhibition of the proteasome.** The proteasome plays an important role in survival by preventing accumulation of misfolded and damaged proteins. Inhibiting proteasome activity by bortezomib can reduce the viability of plasma cells, thus avoiding the release of autoantibodies.

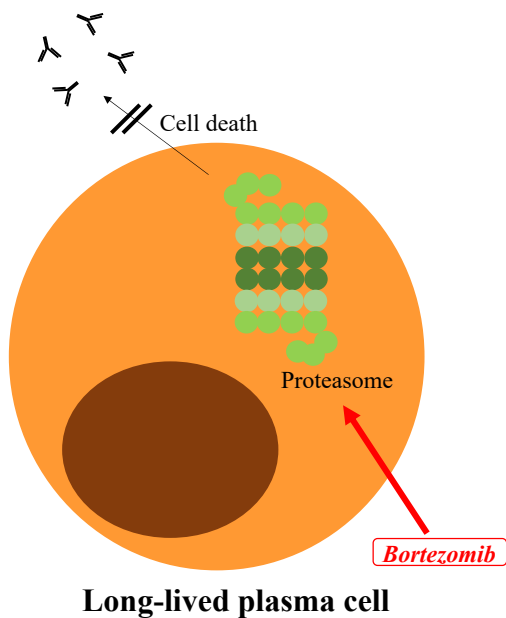

**Supplementary Table S1. Features of TPO-RAs**

| Topic                           | Romiplostim                          | Eltrombopag                                                                                                  | Avatrombopag                                                         |
|---------------------------------|--------------------------------------|--------------------------------------------------------------------------------------------------------------|----------------------------------------------------------------------|
| Molecular structure             | Peptide                              | Small molecule                                                                                               | Small molecule                                                       |
| TPO-R binding                   | Extracellular domain                 | Transmembrane domain                                                                                         | Transmembrane domain                                                 |
| JAK/Stat activation             | ++++                                 | +                                                                                                            | +                                                                    |
| Route of administration         | Subcutaneous                         | Oral                                                                                                         | Oral                                                                 |
| Dosing frequency <sup>a</sup>   | Weekly                               | Daily <sup>b</sup>                                                                                           | Daily                                                                |
| Relevant food interactions      | n.a.                                 | Yes (polyvalent cations)                                                                                     | No                                                                   |
| Lower dose if liver dysfunction | No                                   | Yes                                                                                                          | No                                                                   |
| Use in renal failure            | Yes                                  | Probably yes                                                                                                 | Probably yes                                                         |
| Use in pregnancy                | No                                   | No                                                                                                           | No                                                                   |
| Current indications             | Chronic ITP<br>(adults and children) | Chronic ITP<br>(adults and children)<br>Hepatitis C-associated<br>thrombocytopenia<br>Severe aplastic anemia | Chronic ITP (adults)<br>Periprocedural<br>thrombocytopenia in<br>CLD |

<sup>a</sup>Per drug label. <sup>b</sup>May sometimes be given less frequently. CLD, chronic liver disease; ITP, primary immune thrombocytopenia; n.a., not applicable; TPO-R, thrombopoietin receptor; TPO-RAs, thrombopoietin receptor agonists.

**Supplementary Table S2. Characteristics of drugs used as third (or more) line options in ITP management**

| <b>Drug</b>          | <b>Dose</b>                                                     | <b>Onset of action/<br/>Peak response<br/>(d)</b> | <b>Overall response</b>                                          | <b>Side effects</b>                                                                            |
|----------------------|-----------------------------------------------------------------|---------------------------------------------------|------------------------------------------------------------------|------------------------------------------------------------------------------------------------|
| <b>MMF</b>           | 500 mg p.o. BD for 2 wk, then<br>1 g p.o. BD                    | 28-56/n.a.                                        | 30-60%                                                           | Diarrhea, nausea,<br>headache,<br>teratogenicity                                               |
| <b>Cyclosporin A</b> | 2.5-3 mg/kg/d p.o., titrating to<br>keep level in 100-200 ng/mL | 21-28/n.a.                                        | Complete<br>response: 40%<br>Platelet<br>improvement: 50-<br>80% | Hypertension,<br>renal dysfunction,<br>hypertrichosis,<br>gum hypertrophy                      |
| <b>Danazol</b>       | 400-800 mg/d p.o.                                               | 14-90/28-180                                      | 30-60%                                                           | Acne, hirsutism,<br>amenorrhea, liver<br>dysfunction                                           |
| <b>Azathioprine</b>  | 1-2 mg/kg/d p.o. (maximum<br>150 mg)                            | 3-90/30-180                                       | 30-60%                                                           | Fatigue,<br>neutropenia,<br>hepatotoxicity,<br>increased risk of<br>malignancy                 |
| <b>Dapsone</b>       | 75-100 mg/d p.o.                                                | 21-28/n.a.                                        | 30-60%                                                           | Nausea,<br>dyspepsia,<br>methemoglobline<br>mia, skin rash,<br>hemolysis if<br>G6PD deficiency |

BD, twice a day; d, days; G6PD, glucose-6-phosphate dehydrogenase; MMF, mycophenolate mofetil;  
n.a., not available; p.o., oral; wk, weeks.
